# Supplementary material
Source: Springer Nature journal article supplement (https://www.springermedizin.de/resource/supplementary/12957_2012_1594_MOESM1_ESM.pdf/9563932)

(a)

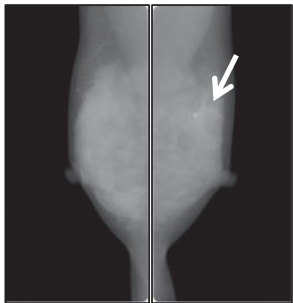

(b)

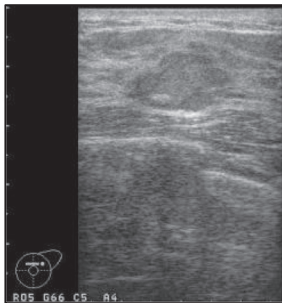

(c)

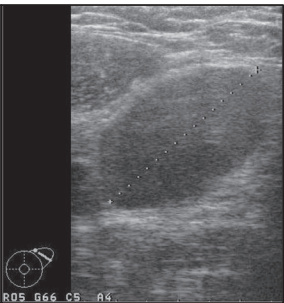

(d)

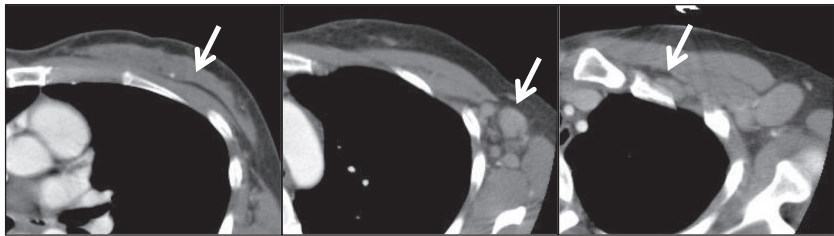

(e)

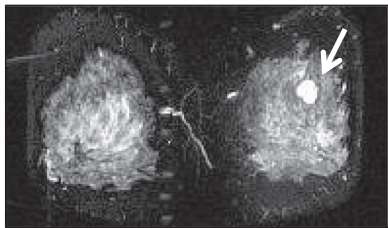

Supplement: MOESM1 [file 9563932]
